# Supplementary material for: Notch family members follow stringent requirements for intracellular domain dimerization at sequence-paired sites
Source: PubMed Central journal article supplement (PMC7685452; doi:10.1371/journal.pone.0234101), 2020-11-24

Figure 1C

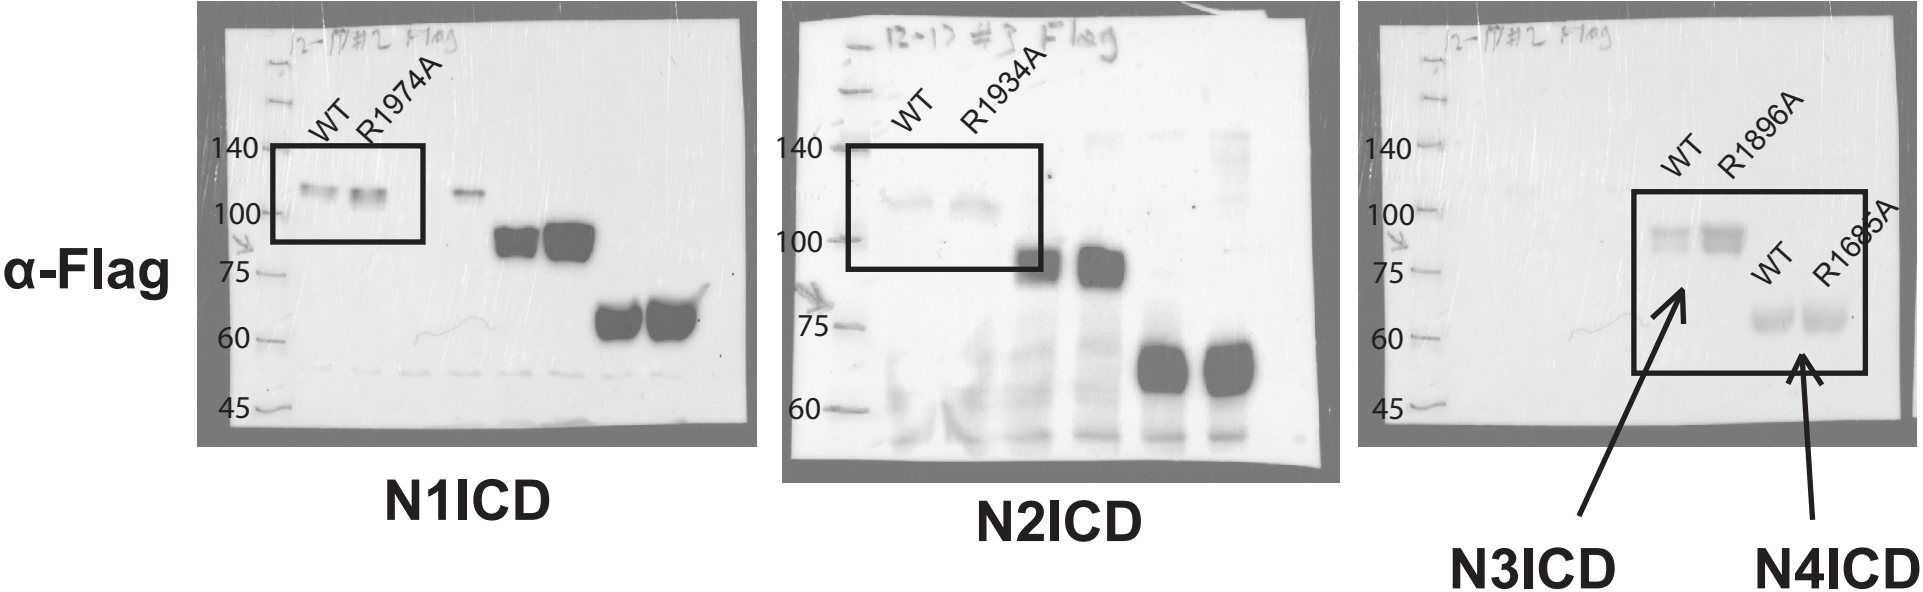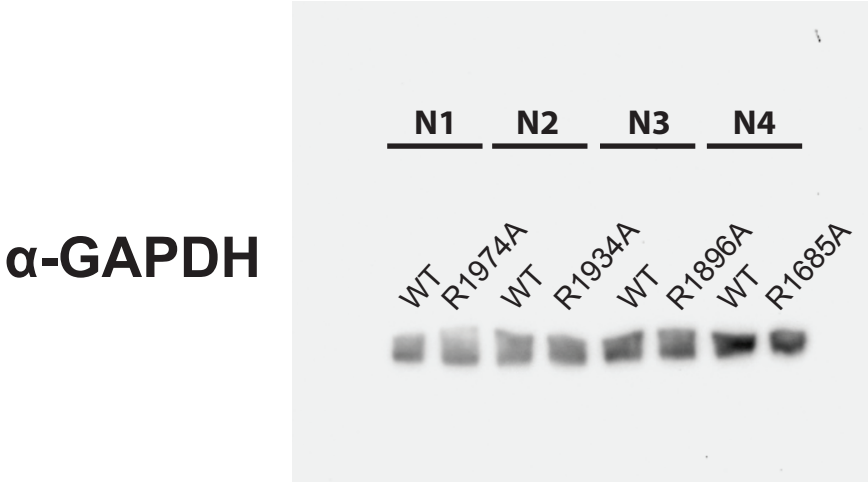

Figure 4C

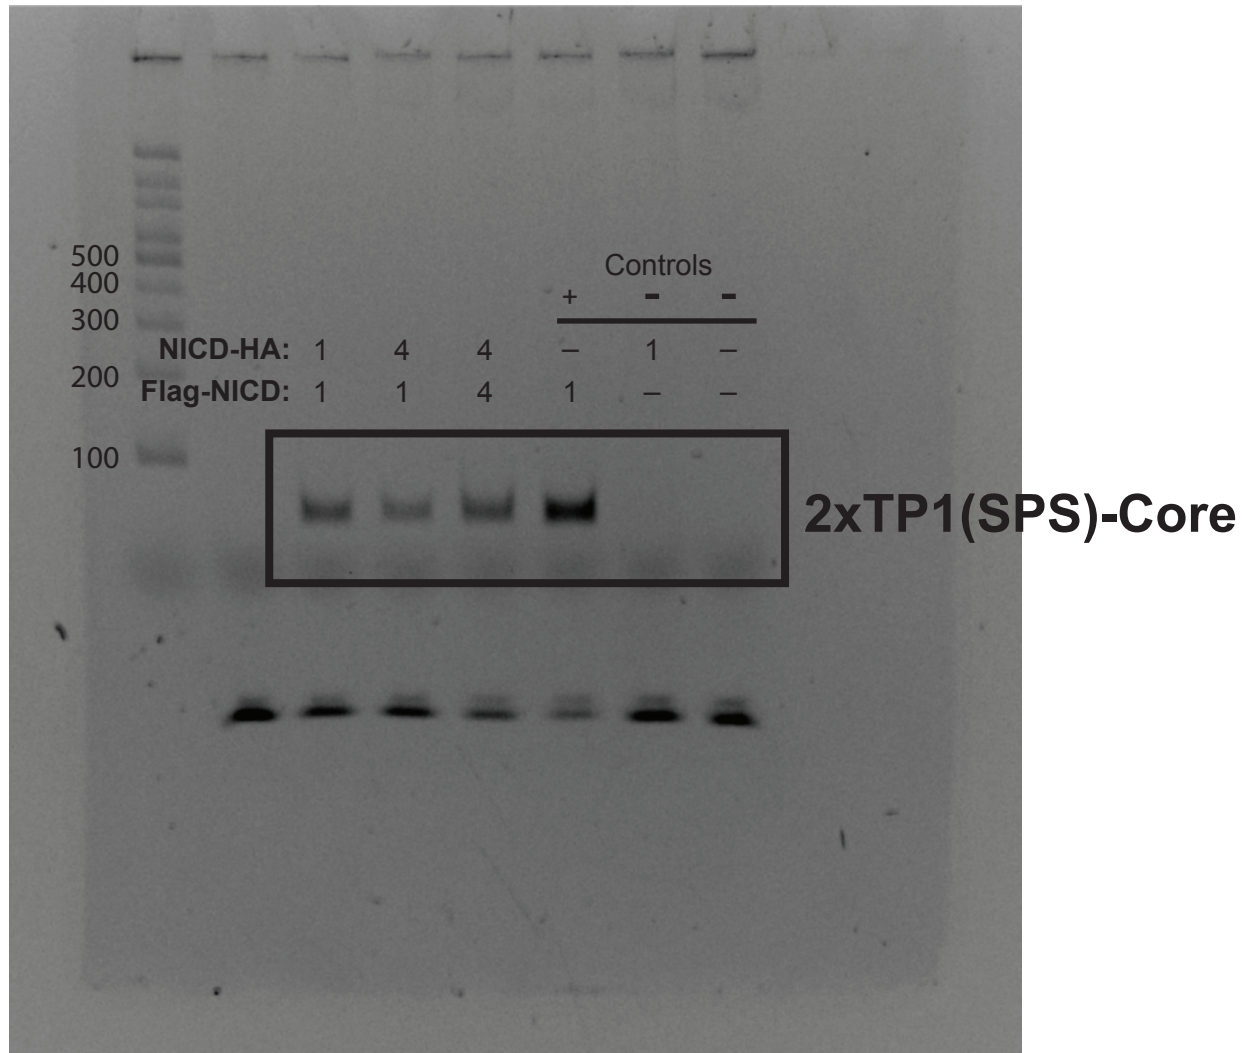

Supplement: pone.0234101.s005.pdf [file pone.0234101.s005.pdf]
